# Supplementary material
Source: PubMed Central journal article supplement (PMC3880801)

Type of file: figure

Label: Supplementary Fig1

Filename: S1.tif

**A****PDMS with PDL coating**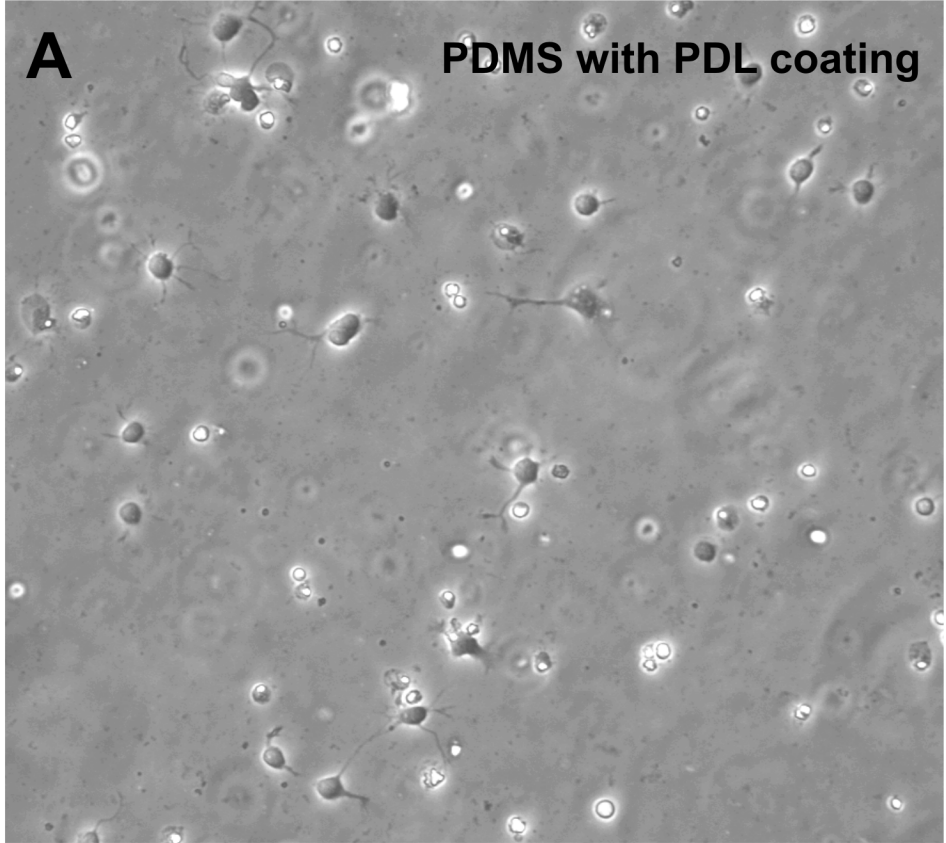**B****PDMS without coating**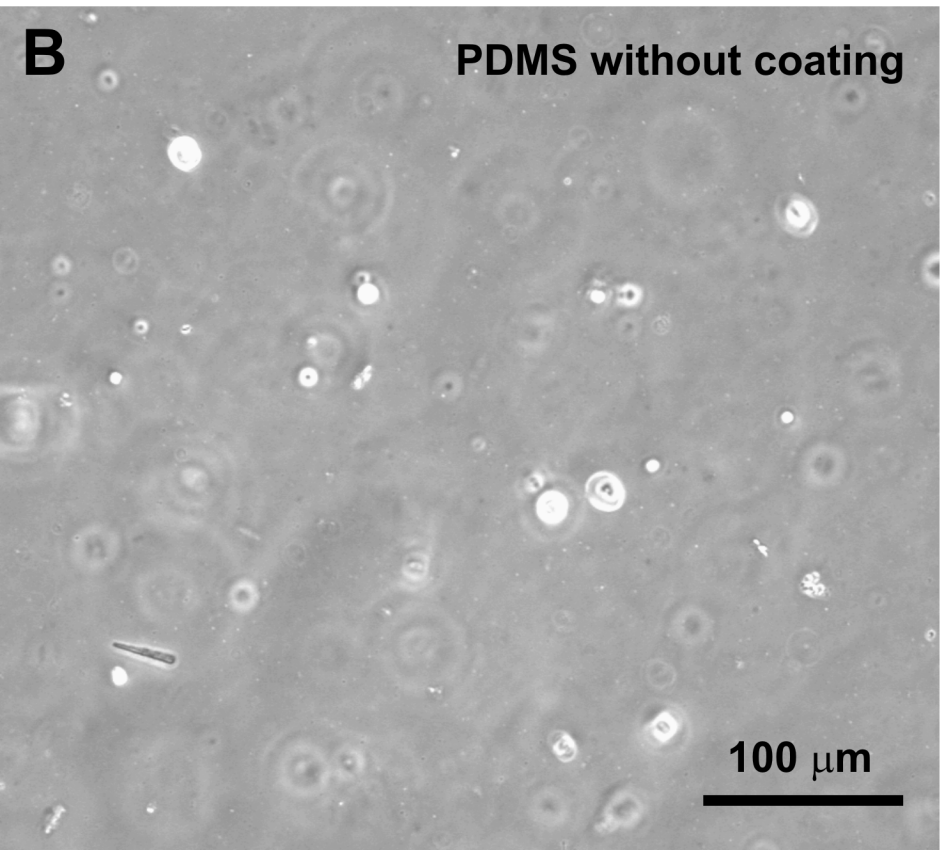

Type of file: figure

Label: Supplementary Fig2

Filename: S2-final.tif

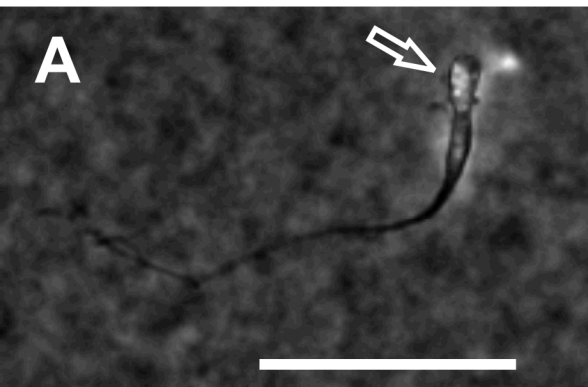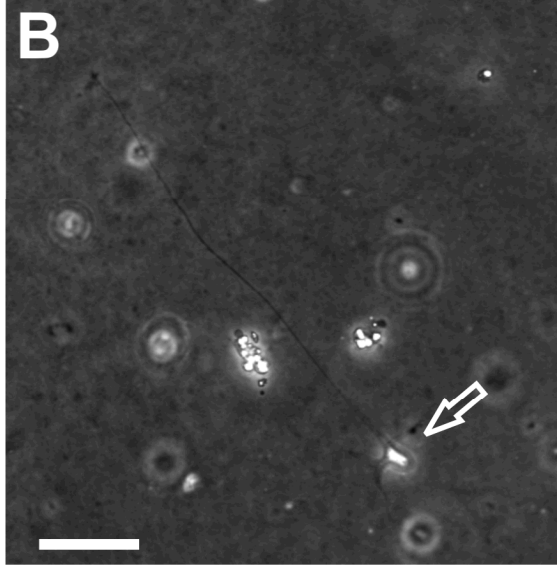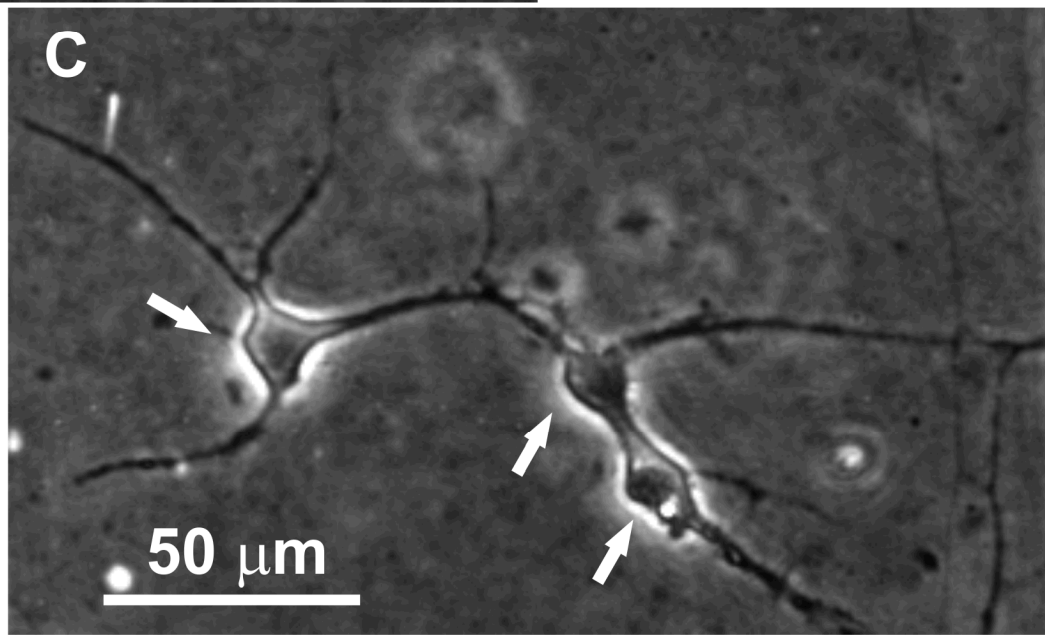

Type of file: figure

Label: Supplementary Fig3

Filename: S3-final.tif

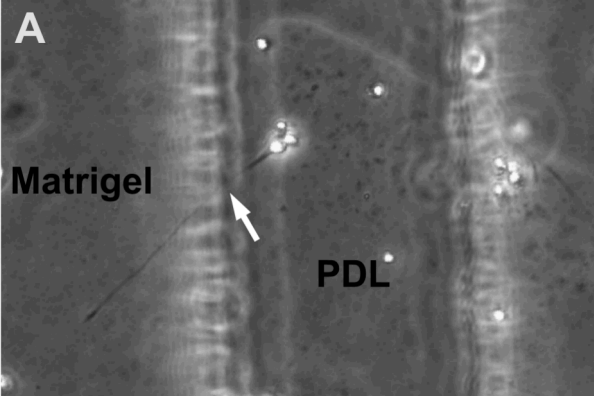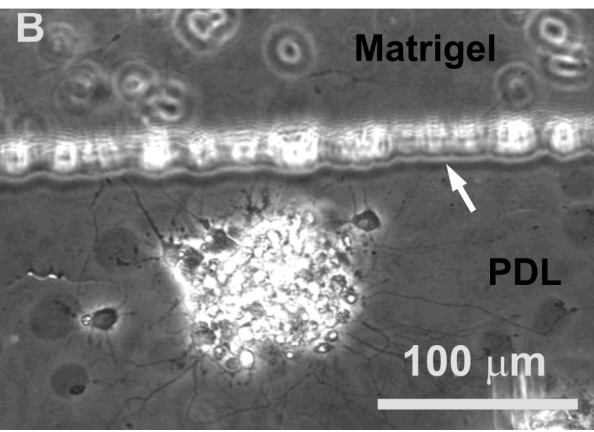

Supplement: NIHMS473198-supplement-01.pdf [file NIHMS473198-supplement-01.pdf]
